# Supplementary material
Source: ML conference proceedings conference paper supplement (https://proceedings.mlr.press/v119/seddik20a.html)
Supplement: Supplementary file [file seddik20a-supp.pdf]

---

# Supplementary Material of “Random Matrix Theory Proves that Deep Learning Representations of GAN-data Behave as Gaussian Mixtures”

---

Mohamed El Amine Seddik<sup>1,2</sup> Cosme Louart<sup>1,3</sup> Mohamed Tamaazousti<sup>1</sup> Romain Couillet<sup>2,3</sup>

## Abstract

This supplementary material provides the proof of our main results, specifically a detailed proof for Theorem 3.3 and a proof for the Proposition 3.1.

## 1. Proof of Theorem 3.3

### 1.1. Setting of the proof

For simplicity, we will only suppose the case  $k = 1$  and we consider the following notations that will be used subsequently.

$$\bar{\mathbf{x}} = \mathbb{E}\mathbf{x}_i, \mathbf{C} = \mathbb{E}[\mathbf{x}_i\mathbf{x}_i^\top], \mathbf{X}_0 = \mathbf{X} - \bar{\mathbf{x}}\mathbf{1}_n^\top, \mathbf{C}_0 = \mathbb{E}[\mathbf{X}_0\mathbf{X}_0^\top/n].$$

Let

$$\mathbf{X}_{-i} = (\mathbf{x}_1, \dots, \mathbf{x}_{i-1}, 0, \mathbf{x}_i, \dots, \mathbf{x}_n)$$

the matrix  $\mathbf{X}$  with a vector of zeros at its  $i$ th column.

Denote the resolvents

$$\mathbf{R} = \left( \frac{\mathbf{X}^\top\mathbf{X}}{p} + z\mathbf{I}_n \right)^{-1}, \mathbf{Q} = \left( \frac{\mathbf{X}\mathbf{X}^\top}{p} + z\mathbf{I}_p \right)^{-1}, \mathbf{Q}_{-i} = \left( \frac{\mathbf{X}\mathbf{X}^\top}{p} - \frac{\mathbf{x}_i\mathbf{x}_i^\top}{p} + z\mathbf{I}_p \right)^{-1} \quad (1)$$

And let

$$\tilde{\mathbf{Q}} = \left( \frac{1}{c} \frac{\mathbf{C}}{1 + \delta} + z\mathbf{I}_p \right)^{-1}, \quad (2)$$

where  $\delta$  is the solution to the fixed point equation

$$\delta = \frac{1}{p} \operatorname{tr} \left( \mathbf{C} \left( \frac{1}{c} \frac{\mathbf{C}}{1 + \delta} + z\mathbf{I}_p \right)^{-1} \right).$$

### 1.2. Basic tools

**Lemma 1.1** ((Ledoux, 2005)). *Let  $\mathbf{z} \in \mathcal{E}_q(1 | \mathbb{R}^p, \|\cdot\|)$  and  $\mathbf{M} \in \mathcal{E}_q(1 | \mathbb{R}^{p \times n}, \|\cdot\|_F)$ . Then, for some numerical constant  $C > 0$*

- $\mathbb{E}\|\mathbf{z}\| \leq \|\mathbb{E}\mathbf{z}\| + C\sqrt{p}$ ,  $\mathbb{E}\|\mathbf{z}\|_\infty \leq \|\mathbb{E}\mathbf{z}\|_\infty + C\sqrt{\log p}$ .
- $\mathbb{E}\|\mathbf{M}\| \leq \|\mathbb{E}\mathbf{M}\| + C\sqrt{p+n}$ ,  $\mathbb{E}\|\mathbf{M}\|_F \leq \|\mathbb{E}\mathbf{M}\|_F + C\sqrt{pn}$ .

---

<sup>1</sup>CEA List, Palaiseau, France <sup>2</sup>Centralesupélec, Gif-sur-Yvette, France <sup>3</sup>University Grenoble-Alpes, Grenoble, France. Correspondence to: MEA.Seddik <mohamedelamine.seddik@cea.fr>.

**Lemma 1.2.** Denote  $\mathbf{Q}_{\bar{\mathbf{x}}} = (\bar{\mathbf{x}}\bar{\mathbf{x}}^\top + z\mathbf{I}_p)^{-1}$ , we have:

$$\mathbf{Q}_{\bar{\mathbf{x}}}\bar{\mathbf{x}} = \frac{\bar{\mathbf{x}}}{\|\bar{\mathbf{x}}\|^2 + z} \quad \text{and} \quad \|\tilde{\mathbf{Q}}\bar{\mathbf{x}}\|, \bar{\mathbf{x}}\tilde{\mathbf{Q}}\bar{\mathbf{x}} = \mathcal{O}(1).$$

Moreover, if  $\|\bar{\mathbf{x}}\| \geq \sqrt{p}$ ,  $\|\tilde{\mathbf{Q}}\bar{\mathbf{x}}\| = \mathcal{O}(p^{-1/2})$ .

*Proof.* Since  $z\mathbf{Q}_{\bar{\mathbf{x}}} = \mathbf{I}_p - \mathbf{Q}_{\bar{\mathbf{x}}}\bar{\mathbf{x}}\bar{\mathbf{x}}^\top$ :

$$z\mathbf{Q}_{\bar{\mathbf{x}}}\bar{\mathbf{x}} = \bar{\mathbf{x}} - \|\bar{\mathbf{x}}\|^2\mathbf{Q}_{\bar{\mathbf{x}}}\bar{\mathbf{x}},$$

and we recover the first identity of the Lemma.

And since the matrix  $\mathbf{C}_0$  is nonnegative symmetric, we have :

$$\tilde{\mathbf{Q}}\bar{\mathbf{x}} = \left( \frac{1}{c} \frac{\mathbf{C}_0 + \bar{\mathbf{x}}\bar{\mathbf{x}}^\top}{1 + \delta} + z\mathbf{I}_p \right)^{-1} \bar{\mathbf{x}} \leq \frac{c(1 + \delta)\bar{\mathbf{x}}}{\|\bar{\mathbf{x}}\|^2 + zc(1 + \delta)}.$$

Therefore,  $\bar{\mathbf{x}}\tilde{\mathbf{Q}}\bar{\mathbf{x}} = \frac{c(1 + \delta)\|\bar{\mathbf{x}}\|^2}{\|\bar{\mathbf{x}}\|^2 + zc(1 + \delta)} = \mathcal{O}(1)$  and:

$$\|\tilde{\mathbf{Q}}\bar{\mathbf{x}}\| = \frac{c(1 + \delta)\|\bar{\mathbf{x}}\|}{\|\bar{\mathbf{x}}\|^2 + zc(1 + \delta)} \leq \begin{cases} \frac{\|\bar{\mathbf{x}}\|}{z} = \mathcal{O}(1) & \text{if } \|\bar{\mathbf{x}}\| \leq 1, \\ \frac{c(1 + \delta)}{\|\bar{\mathbf{x}}\|} = \mathcal{O}(1) & \text{if } \|\bar{\mathbf{x}}\| \geq 1. \end{cases}$$

□

**Proposition 1.3.**  $\bar{\mathbf{x}}^\top \mathbb{E}[\mathbf{Q}]\bar{\mathbf{x}} = \bar{\mathbf{x}}^\top \tilde{\mathbf{Q}}\bar{\mathbf{x}} + \mathcal{O}\left(\sqrt{\frac{\log p}{p}}\right)$

*Proof.* Let us bound:

$$\left| \bar{\mathbf{x}}^\top \mathbf{Q}\bar{\mathbf{x}} - \bar{\mathbf{x}}^\top \tilde{\mathbf{Q}}\bar{\mathbf{x}} \right| \leq \frac{c^{-1}}{1 + \delta} \left| \mathbb{E} \left[ \bar{\mathbf{x}} \mathbf{Q} \mathbf{x}_i \mathbf{x}_i^\top \tilde{\mathbf{Q}}\bar{\mathbf{x}} \left( \frac{1}{p} \mathbf{x}_i^\top \mathbf{Q}_{-i} \mathbf{x}_i - \delta \right) \right] \right| + \frac{1}{p} \mathbb{E} \left[ \bar{\mathbf{x}}^\top \mathbf{Q}_{-i} \mathbf{x}_i \mathbf{x}_i^\top \mathbf{Q} \mathbf{C} \tilde{\mathbf{Q}}\bar{\mathbf{x}} \right]$$

Now let us consider a supplementary random vector  $\mathbf{x}_{n+1}$  following the same law as the  $\mathbf{x}_i$ 's and independent of  $\mathbf{X}$ . We divide the set  $\mathbb{I} = [n + 1]$  into two sets  $\mathbb{I}_{\frac{1}{2}}$  and  $\mathbb{I}_{\frac{2}{2}}$  of same cardinality ( $\lfloor \frac{n+1}{2} \rfloor \leq \#\mathbb{I}_{\frac{1}{2}}, \#\mathbb{I}_{\frac{2}{2}} \leq \lceil \frac{n+1}{2} \rceil$ ), we note  $\mathbf{X}_{\frac{1}{2}} = (\mathbf{x}_i \mid i \in \mathbb{I}_{\frac{1}{2}})$ ,  $\mathbf{X}_{\frac{2}{2}} = (\mathbf{x}_i \mid i \in \mathbb{I}_{\frac{2}{2}})$  and we introduce the diagonal matrices  $\mathbf{\Delta} = \text{diag} \left( \frac{1}{p} \mathbf{x}_i^\top \mathbf{Q}_{-i} \mathbf{x}_i - \delta \mid i \in \mathbb{I}_{\frac{1}{2}} \right)$ ,  $\mathbf{D} = \text{diag} \left( 1 + \frac{1}{p+1} \mathbf{x}_i^\top \mathbf{Q} \mathbf{x}_i \mid i \in \mathbb{I}_{\frac{2}{2}} \right)$ . We have the bound:

$$\begin{aligned} & \left| \mathbb{E} \left[ \bar{\mathbf{x}} \mathbf{Q} \mathbf{x}_i \mathbf{x}_i^\top \tilde{\mathbf{Q}}\bar{\mathbf{x}} \left( \frac{1}{p} \mathbf{x}_i^\top \mathbf{Q}_{-i} \mathbf{x}_i - \delta \right) \right] \right| \\ &= \left| \mathbb{E} \left[ \left( 1 + \frac{1}{p} \mathbf{x}_{n+1}^\top \mathbf{Q} \mathbf{x}_{n+1} \right) \mathbf{x}_{n+1} \mathbf{Q}_{+(n+1)} \mathbf{x}_i \mathbf{x}_i^\top \tilde{\mathbf{Q}}\bar{\mathbf{x}} \left( \frac{1}{p} \mathbf{x}_i^\top \mathbf{Q}_{-i} \mathbf{x}_i - \delta \right) \right] \right| \\ &= \frac{1}{p^2} \left| \mathbb{E} \left[ \mathbf{1}^\top \mathbf{D} \mathbf{X}_{\frac{2}{2}}^\top \mathbf{Q}_{+(n+1)} \mathbf{X}_{\frac{1}{2}} \mathbf{\Delta} \mathbf{X}_{\frac{1}{2}}^\top \tilde{\mathbf{Q}}\bar{\mathbf{x}} \right] \right| \\ &\leq \sqrt{\mathbb{E} \left[ \frac{1}{p^3} \mathbf{1}^\top \mathbf{D} \mathbf{X}_{\frac{2}{2}}^\top \mathbf{Q}_{+(n+1)} \mathbf{X}_{\frac{1}{2}} \mathbf{\Delta}^2 \mathbf{X}_{\frac{1}{2}}^\top \mathbf{Q}_{+(n+1)} \mathbf{X}_{\frac{2}{2}} \mathbf{D} \mathbf{1} \right]} \mathbb{E} \left[ \frac{1}{p} \bar{\mathbf{x}}^\top \tilde{\mathbf{Q}} \mathbf{X}_{\frac{1}{2}} \mathbf{X}_{\frac{1}{2}}^\top \tilde{\mathbf{Q}}\bar{\mathbf{x}} \right] \\ &\leq \sqrt{\mathbb{E} \left[ \left\| \frac{1}{p} \mathbf{X}_{\frac{2}{2}}^\top \mathbf{Q}_{+(n+1)} \mathbf{X}_{\frac{1}{2}} \right\|^2 \|\mathbf{D}\|^2 \|\mathbf{\Delta}\|^2 \right]} \mathbb{E} \left[ \bar{\mathbf{x}} \tilde{\mathbf{Q}} \mathbf{C} \tilde{\mathbf{Q}}\bar{\mathbf{x}} \right] \leq \mathcal{O} \left( \sqrt{\frac{\log p}{p}} \right), \end{aligned}$$

thanks to Lemma 1.1 and Lemma 1.2 (the spectral norm of  $\mathbf{\Delta}$  and  $\mathbf{D}$  is just an infinity norm if we see them as random vectors of  $\mathbb{R}^n$ ). We can bound  $\frac{1}{p} \mathbb{E} \left[ \bar{\mathbf{x}}^\top \mathbf{Q}_{-i} \mathbf{x}_i \mathbf{x}_i^\top \mathbf{Q} \mathbf{C} \tilde{\mathbf{Q}}\bar{\mathbf{x}} \right]$  the same way to obtain the result of the proposition. □

**Proposition 1.4.**  $\|\mathbb{E}[\mathbf{x}_i^\top \mathbf{Q}_{-i} \mathbf{X}_{-i}] - \frac{\bar{\mathbf{x}}^\top \tilde{\mathbf{Q}} \bar{\mathbf{x}} \mathbf{1}^\top \mathbf{u}}{1+\delta}\| = \mathcal{O}(\sqrt{\log p})$

*Proof.* Considering  $\mathbf{u} \in \mathbb{R}^n$  such that  $\|\mathbf{u}\| = 1$ :

$$\begin{aligned} & \left| \mathbb{E}[\mathbf{x}_i^\top \mathbf{Q}_{-i} \mathbf{X}_{-i} \mathbf{u}] - \frac{\bar{\mathbf{x}}^\top \tilde{\mathbf{Q}} \bar{\mathbf{x}} \mathbf{1}^\top \mathbf{u}}{1+\delta} \right| \\ &= \left| \sum_{\substack{j=1 \\ j \neq i}}^n \mathbf{u}_j \mathbb{E} \left[ \frac{\mathbf{x}_i^\top \mathbf{Q}_{-j} \mathbf{x}_j}{1 + \frac{1}{p} \mathbf{x}_j^\top \mathbf{Q}_{-j} \mathbf{x}_j} - \frac{\mathbf{x}_i^\top \tilde{\mathbf{Q}} \mathbf{x}_j}{1+\delta} \right] \right| \\ &\leq \sqrt{n} \left| \mathbb{E} \left[ \frac{\mathbf{x}_i^\top \mathbf{Q}_{-j} \mathbf{x}_j}{1 + \frac{1}{p} \mathbf{x}_j^\top \mathbf{Q}_{-j} \mathbf{x}_j} - \frac{\mathbf{x}_i^\top \tilde{\mathbf{Q}} \mathbf{x}_j}{1+\delta} \right] \right| + \left| \frac{1}{1+\delta} \mathbb{E} [\mathbf{x}_i^\top \mathbf{Q}_{-j} \mathbf{x}_j - \mathbf{x}_i^\top \tilde{\mathbf{Q}} \mathbf{x}_j] \right| \quad (\text{where } i \neq j) \\ &\leq \sqrt{n} \left| \mathbb{E} \left[ \bar{\mathbf{x}}^\top \mathbf{Q} \mathbf{x}_j \left( \frac{1}{p} \mathbf{x}_j^\top \mathbf{Q}_{-j} \mathbf{x}_j - \delta \right) \right] \right| + \sqrt{n} \left| \mathbb{E} [\bar{\mathbf{x}}^\top \mathbf{Q}_{-j} \bar{\mathbf{x}} - \bar{\mathbf{x}}^\top \tilde{\mathbf{Q}} \bar{\mathbf{x}}] \right|, \end{aligned}$$

where the first term is treated the same way as we did in the proof of Proposition 1.3 and the second term is bounded thanks to Proposition 1.3  $\square$

### 1.3. Main body of the proof

*Proof of Theorem 3.3.* Recall the definition of the resolvents  $\mathbf{R}$  and  $\mathbf{Q}$  in Equation (1). The first step of the proof is to show the concentration of  $\mathbf{R}$ . This comes from the fact that the application  $\Phi : \mathbf{X} \mapsto (\mathbf{X}^\top \mathbf{X} + z \mathbf{I}_n)^{-1}$  is  $2z^{-3/2}$ -Lipschitz w.r.t. the Frobenius norm. Indeed, by the matrix identity  $\mathbf{A} - \mathbf{B} = \mathbf{A}(\mathbf{B}^{-1} - \mathbf{A}^{-1})\mathbf{B}$ , we have

$$\Phi(\mathbf{X}) - \Phi(\mathbf{X} + \mathbf{H}) = \Phi(\mathbf{X})(\mathbf{H}^\top \mathbf{X} + (\mathbf{X} + \mathbf{H})^\top \mathbf{H})\Phi(\mathbf{X} + \mathbf{H})$$

And by the bounds  $\|\mathbf{A}\mathbf{B}\|_F \leq \|\mathbf{A}\| \cdot \|\mathbf{B}\|_F$ ,  $\|\Phi(\mathbf{X})\mathbf{X}^\top\| \leq z^{-1/2}$  and  $\|\Phi(\mathbf{X})\| \leq z^{-1}$ , we have

$$\|\Phi(\mathbf{X} + \mathbf{H}) - \Phi(\mathbf{X})\|_F \leq \frac{2}{z^{3/2}} \|\mathbf{H}\|_F.$$

Therefore, given  $\mathbf{X} \in \mathcal{E}_q(1 | \mathbb{R}^{p \times n}, \|\cdot\|_F)$  and since the application  $\mathbf{X} \mapsto \mathbf{R} = \Phi(\mathbf{X}/\sqrt{p})$  is  $2z^{-3/2}p^{-1/2}$ -Lipschitz, we have by Proposition ?? that  $\mathbf{R} \in \mathcal{E}_q(p^{-1/2} | \mathbb{R}^{n \times n}, \|\cdot\|_F)$ .

The second step consists in estimating  $\mathbb{E}\mathbf{R}(z)$  through a deterministic matrix  $\tilde{\mathbf{R}}$ . Indeed, by the identity  $(\mathbf{M}^\top \mathbf{M} + z\mathbf{I})^{-1} \mathbf{M}^\top = \mathbf{M}^\top (\mathbf{M} \mathbf{M}^\top + z\mathbf{I})^{-1}$ , the resolvent  $\mathbf{R}$  can be expressed in function of  $\mathbf{Q}$  as follows

$$\mathbf{R} = \frac{1}{z} \left( \mathbf{I}_n - \frac{\mathbf{X}^\top \mathbf{Q} \mathbf{X}}{p} \right), \quad (3)$$

thus a deterministic equivalent for  $\mathbf{R}$  can therefore be obtained through a deterministic equivalent of the matrix  $\mathbf{X}^\top \mathbf{Q} \mathbf{X}$ . However, as demonstrated in (Louart & Couillet, 2019), the matrix  $\mathbf{Q}$  has as a deterministic equivalent the matrix  $\tilde{\mathbf{Q}}$  defined in equation 2. In the following, we aim at deriving a deterministic equivalent for  $\frac{1}{p} \mathbf{X}^\top \mathbf{Q} \mathbf{X}$  in function of  $\tilde{\mathbf{Q}}$ . Let  $\mathbf{u}$  and  $\mathbf{v}$  be two unitary vectors in  $\mathbb{R}^n$ , and let us estimate

$$\Delta \equiv \mathbb{E} \left[ \mathbf{u}^\top \left( \frac{\mathbf{X}^\top \mathbf{Q} \mathbf{X}}{p} - \frac{\mathbf{X}^\top \tilde{\mathbf{Q}} \mathbf{X}}{p} \right) \mathbf{v} \right] = \frac{1}{p} \mathbb{E} \left[ \frac{\mathbf{u}^\top \mathbf{X}^\top \mathbf{Q} \mathbf{C} \tilde{\mathbf{Q}} \mathbf{X} \mathbf{v}}{1+\delta} - \frac{1}{p} \mathbf{u}^\top \mathbf{X}^\top \mathbf{Q} \mathbf{X} \mathbf{X}^\top \tilde{\mathbf{Q}} \mathbf{X} \mathbf{v} \right]$$

With the following matrix identities (to explore the independence of the columns of  $\mathbf{X}$ ):

$$\mathbf{Q} = \mathbf{Q}_{-i} - \frac{1}{p} \mathbf{Q}_{-i} \mathbf{x}_i \mathbf{x}_i^\top \mathbf{Q}, \quad \mathbf{Q} \mathbf{x}_i = \frac{\mathbf{Q}_{-i} \mathbf{x}_i}{1 + \frac{1}{p} \mathbf{x}_i^\top \mathbf{Q}_{-i} \mathbf{x}_i}, \quad \mathbf{A} - \mathbf{B} = \mathbf{A}(\mathbf{B}^{-1} - \mathbf{A}^{-1})\mathbf{B}$$

and the decomposition  $QX X^\top = \sum_{i=1}^n Qx_i x_i^\top$ , we obtain:

$$\begin{aligned} \Delta &= \frac{1}{p^2} \mathbb{E} \left[ \sum_{i=1}^n \frac{\mathbf{u}^\top X^\top Q_{-i} C \tilde{Q} X \mathbf{v}}{1 + \delta} - \frac{\mathbf{u}^\top X^\top Q_{-i} x_i x_i^\top \tilde{Q} X \mathbf{v}}{1 + \frac{1}{p} x_i^\top Q_{-i} x_i} - \frac{1}{p} \frac{\mathbf{u}^\top X^\top Q_{-i} x_i x_i^\top Q C \tilde{Q} X \mathbf{v}}{1 + \delta} \right] \\ &= \frac{1}{p^2} \sum_{i=1}^n \mathbb{E} \left[ \frac{\mathbf{u}^\top X_{-i}^\top Q_{-i} C \tilde{Q} X_{-i} \mathbf{v}}{1 + \delta} - \frac{\mathbf{u}^\top X_{-i}^\top Q_{-i} x_i x_i^\top \tilde{Q} X_{-i} \mathbf{v}}{1 + \frac{1}{p} x_i^\top Q_{-i} x_i} \right. \\ &\quad + \frac{\mathbf{u}_i x_i^\top Q_{-i} C \tilde{Q} X_{-i} \mathbf{v}}{1 + \delta} + \frac{\mathbf{v}_i \mathbf{u}^\top X_{-i}^\top Q_{-i} C \tilde{Q} x_i}{1 + \delta} + \mathbf{u}_i \mathbf{v}_i \frac{x_i^\top Q_{-i} C \tilde{Q} x_i}{1 + \delta} \\ &\quad - \frac{\mathbf{u}_i x_i^\top Q_{-i} x_i x_i^\top \tilde{Q} X_{-i} \mathbf{v}}{1 + \frac{1}{p} x_i^\top Q_{-i} x_i} - \frac{\mathbf{v}_i \mathbf{u}^\top X_{-i}^\top Q_{-i} x_i x_i^\top \tilde{Q} x_i}{1 + \frac{1}{p} x_i^\top Q_{-i} x_i} - \mathbf{u}_i \mathbf{v}_i \frac{x_i^\top Q_{-i} x_i x_i^\top \tilde{Q} x_i}{1 + \frac{1}{p} x_i^\top Q_{-i} x_i} \\ &\quad \left. - \frac{1}{p} \frac{\mathbf{u}^\top X^\top Q_{-i} x_i x_i^\top Q C \tilde{Q} X \mathbf{v}}{1 + \delta} \right] \end{aligned}$$

We can show with Holder's inequality and the concentration bounds (mainly the fact that  $\frac{1}{p} x_i^\top Q_{-i} x_i$  concentrates around  $\delta$ ) developed in (Louart & Couillet, 2019), that most of the above quantities vanish asymptotically. As a toy example, we consider the following term:

$$\begin{aligned} &\left| \frac{1}{p^2} \sum_{i=1}^n \mathbb{E} \left[ \frac{\mathbf{u}^\top X_{-i}^\top Q_{-i} C \tilde{Q} X_{-i} \mathbf{v}}{1 + \delta} - \frac{\mathbf{u}^\top X_{-i}^\top Q_{-i} x_i x_i^\top \tilde{Q} X_{-i} \mathbf{v}}{1 + \frac{1}{p} x_i^\top Q_{-i} x_i} \right] \right| \\ &= \left| \frac{1}{p^2} \sum_{i=1}^n \mathbb{E} \left[ \frac{\mathbf{u}^\top X_{-i}^\top Q_{-i} x_i x_i^\top \tilde{Q} X_{-i} \mathbf{v}}{(1 + \delta)(1 + \frac{1}{p} x_i^\top Q_{-i} x_i)} - \frac{\delta - \frac{1}{p} x_i^\top Q_{-i} x_i}{(1 + \delta)(1 + \frac{1}{p} x_i^\top Q_{-i} x_i)} \right] \right| \\ &\leq \left| \frac{1}{p^2} \sum_{i=1}^n \mathbb{E} \left[ (\mathbf{u}^\top X_{-i}^\top Q_{-i} x_i)(x_i^\top \tilde{Q} X_{-i} \mathbf{v}) \left( \delta - \frac{1}{p} x_i^\top Q_{-i} x_i \right) \right] \right| \\ &\leq \left| \frac{1}{p} \sum_{i=1}^n \left( \mathbb{E} \left[ \left( \frac{1}{\sqrt{p}} \mathbf{u}^\top X_{-i}^\top Q_{-i} x_i \right)^3 \right] \mathbb{E} \left[ \left( \frac{1}{\sqrt{p}} x_i^\top \tilde{Q} X_{-i} \mathbf{v} \right)^3 \right] \mathbb{E} \left[ \left( \delta - \frac{1}{p} x_i^\top Q_{-i} x_i \right)^3 \right] \right)^{\frac{1}{3}} \right| \\ &= \mathcal{O} \left( \frac{1}{\sqrt{p}} \right) \end{aligned}$$

Similarly, we can show that:

$$\begin{aligned} &\left| \frac{1}{p^2} \sum_{i=1}^n \mathbb{E} \left[ \frac{\mathbf{u}_i x_i^\top Q_{-i} C \tilde{Q} X_{-i} \mathbf{v}}{1 + \delta} + \frac{\mathbf{v}_i \mathbf{u}^\top X_{-i}^\top Q_{-i} C \tilde{Q} x_i}{1 + \delta} \right. \right. \\ &\quad \left. \left. + \mathbf{u}_i \mathbf{v}_i \frac{x_i^\top Q_{-i} C \tilde{Q} x_i}{1 + \delta} - \frac{1}{p} \frac{\mathbf{u}^\top X^\top Q_{-i} x_i x_i^\top Q C \tilde{Q} X \mathbf{v}}{1 + \delta} \right] \right| = \mathcal{O} \left( \frac{1}{\sqrt{p}} \right) \end{aligned}$$

Finally, the remaining terms in  $\Delta$  can be estimated as follows:

$$\begin{aligned} \Delta &= \frac{1}{p^2} \sum_{i=1}^n \mathbb{E} \left[ - \frac{\mathbf{u}_i x_i^\top Q_{-i} x_i x_i^\top \tilde{Q} X_{-i} \mathbf{v}}{1 + \frac{1}{p} x_i^\top Q_{-i} x_i} \right. \\ &\quad \left. - \frac{\mathbf{v}_i \mathbf{u}^\top X_{-i}^\top Q_{-i} x_i x_i^\top \tilde{Q} x_i}{1 + \frac{1}{p} x_i^\top Q_{-i} x_i} - \mathbf{u}_i \mathbf{v}_i \frac{x_i^\top Q_{-i} x_i x_i^\top \tilde{Q} x_i}{1 + \frac{1}{p} x_i^\top Q_{-i} x_i} \right] + \mathcal{O} \left( \frac{1}{\sqrt{p}} \right) \\ &= - \frac{2}{p} \frac{\delta \mathbf{u}^\top \mathbf{1} \bar{x}^\top \tilde{Q} \bar{x} \mathbf{1}^\top \mathbf{v}}{1 + \delta} - \frac{\delta^2 \mathbf{u}^\top \mathbf{v}}{1 + \delta} + \mathcal{O} \left( \sqrt{\frac{\log p}{p}} \right) \end{aligned}$$

Where the last equality is obtained through the following estimation:

$$\begin{aligned} \frac{1}{p^2} \sum_{i=1}^n \mathbb{E} \left[ \frac{\mathbf{v}_i \mathbf{u}^\top \mathbf{X}_{-i}^\top \mathbf{Q}_{-i} \mathbf{x}_i \mathbf{x}_i^\top \tilde{\mathbf{Q}} \mathbf{x}_i}{1 + \frac{1}{p} \mathbf{x}_i^\top \mathbf{Q}_{-i} \mathbf{x}_i} \right] &= \frac{1}{p} \sum_{i=1}^n \mathbb{E} \left[ \frac{\mathbf{v}_i \mathbf{u}^\top \mathbf{X}_{-i}^\top \mathbf{Q}_{-i} \mathbf{x}_i \left( \frac{1}{p} \mathbf{x}_i^\top \tilde{\mathbf{Q}} \mathbf{x}_i (1 + \delta) - \delta \left( 1 + \frac{1}{p} \mathbf{x}_i^\top \tilde{\mathbf{Q}} \mathbf{x}_i \right) \right)}{\left( 1 + \frac{1}{p} \mathbf{x}_i^\top \mathbf{Q}_{-i} \mathbf{x}_i \right) (1 + \delta)} \right] \\ &\quad + \frac{1}{p} \sum_{i=1}^n \frac{\mathbf{v}_i \delta \mathbb{E}[\mathbf{u}^\top \mathbf{X}_{-i}^\top \mathbf{Q}_{-i} \mathbf{x}_i]}{(1 + \delta)} \end{aligned}$$

With the following bound:

$$\begin{aligned} &\left| \frac{1}{p} \mathbf{x}_i^\top \tilde{\mathbf{Q}} \mathbf{x}_i (1 + \delta) - \delta \left( 1 + \frac{1}{p} \mathbf{x}_i^\top \tilde{\mathbf{Q}} \mathbf{x}_i \right) \right| \\ &= \left| \frac{1}{p} \mathbf{x}_i^\top \tilde{\mathbf{Q}} \mathbf{x}_i (1 + \delta) - \delta (1 + \delta) + \delta (1 + \delta) - \delta \left( 1 + \frac{1}{p} \mathbf{x}_i^\top \tilde{\mathbf{Q}} \mathbf{x}_i \right) \right| \\ &\leq \left| \frac{1}{p} \mathbf{x}_i^\top \tilde{\mathbf{Q}} \mathbf{x}_i - \delta \right| (1 + 2\delta), \end{aligned}$$

we have again with Holder's inequality and Proposition 1.4:

$$\frac{1}{p^2} \sum_{i=1}^n \mathbb{E} \left[ \frac{\mathbf{v}_i \mathbf{u}^\top \mathbf{X}_{-i}^\top \mathbf{Q}_{-i} \mathbf{x}_i \mathbf{x}_i^\top \tilde{\mathbf{Q}} \mathbf{x}_i}{1 + \frac{1}{p} \mathbf{x}_i^\top \mathbf{Q}_{-i} \mathbf{x}_i} \right] = \frac{1}{p} \sum_{i=1}^n \frac{\mathbf{v}_i \delta \mathbf{u}^\top \mathbf{1} \bar{\mathbf{x}}^\top \tilde{\mathbf{Q}} \bar{\mathbf{x}}}{1 + \delta} + \mathcal{O} \left( \sqrt{\frac{\log p}{p}} \right)$$

Now that we estimated  $\Delta$ , it remains to estimate  $\mathbb{E}[\frac{1}{p} \mathbf{X}^\top \tilde{\mathbf{Q}} \mathbf{X}]$ . Indeed, given two unit norm vectors  $\mathbf{u}, \mathbf{v} \in \mathbb{R}^n$  we have:

$$\begin{aligned} \mathbb{E} \left[ \frac{1}{p} \mathbf{u}^\top \mathbf{X}^\top \tilde{\mathbf{Q}} \mathbf{X} \mathbf{v} \right] &= \frac{1}{p} \sum_{i,j=1}^n \mathbf{u}_i \mathbf{v}_j \mathbb{E}[\mathbf{x}_i^\top \tilde{\mathbf{Q}} \mathbf{x}_j] = \frac{1}{p} \sum_{i=1}^n \sum_{\substack{j=1 \\ j \neq i}}^n \mathbf{u}_i \mathbf{v}_j \bar{\mathbf{x}}^\top \tilde{\mathbf{Q}} \bar{\mathbf{x}} + \sum_{i=1}^n \mathbf{u}_i \mathbf{v}_i \delta \\ &= \frac{1}{p} \bar{\mathbf{x}}^\top \tilde{\mathbf{Q}} \bar{\mathbf{x}} \mathbf{u}^\top \mathbf{1} \mathbf{1}^\top \mathbf{v} + \left( \delta - \frac{1}{p} \bar{\mathbf{x}}^\top \tilde{\mathbf{Q}} \bar{\mathbf{x}} \right) \mathbf{u}^\top \mathbf{v} = \frac{1}{p} \bar{\mathbf{x}}^\top \tilde{\mathbf{Q}} \bar{\mathbf{x}} \mathbf{u}^\top \mathbf{M}_1 \mathbf{v}^\top + \delta \mathbf{u}^\top \mathbf{v} + \mathcal{O} \left( \frac{1}{p} \right) \end{aligned}$$

since we have  $\bar{\mathbf{x}}^\top \tilde{\mathbf{Q}} \bar{\mathbf{x}} = \mathcal{O}(1)$  by Lemma 1.2; we introduced the matrix  $\mathbf{M}_1 = \mathbf{1} \mathbf{1}^\top$ . Therefore we have the following estimation:

$$\frac{1}{p} \mathbb{E}[\mathbf{X}^\top \tilde{\mathbf{Q}} \mathbf{X}] = \frac{\delta}{1 + \delta} \mathbf{I}_n + \frac{1}{p} \left( \frac{1 - \delta}{1 + \delta} \right) \bar{\mathbf{x}}^\top \tilde{\mathbf{Q}} \bar{\mathbf{x}} \mathbf{M}_1 + \mathcal{O}_{\|\cdot\|} \left( \sqrt{\frac{\log p}{p}} \right)$$

where  $\mathbf{A} = \mathbf{B} + \mathcal{O}_{\|\cdot\|}(\alpha(p))$  means that  $\|\mathbf{A} - \mathbf{B}\| = \mathcal{O}(\alpha(p))$ . Finally, since  $\mathbf{R}$  concentrates around its mean, we can then conclude:

$$\mathbf{R} = \frac{1}{z} \left( \mathbf{I}_n - \frac{1}{p} \mathbf{X}^\top \tilde{\mathbf{Q}} \mathbf{X} \right) = \frac{1}{z} \frac{1}{1 + \delta} \mathbf{I}_n + \frac{\delta - 1}{pz(\delta + 1)} \bar{\mathbf{x}}^\top \tilde{\mathbf{Q}} \bar{\mathbf{x}} \mathbf{M}_1 + \mathcal{O}_{\|\cdot\|} \left( \sqrt{\frac{\log p}{p}} \right).$$

□

## 2. Proof of Proposition 3.1

*Proof.* Since the Lipschitz constant of a composition of Lipschitz functions is bounded by the product of their Lipschitz constants, we consider the case  $N = 1$  and a linear activation function. In this case, the Lipschitz constant corresponds to the largest singular value of the weight matrix. We consider the following notations for the proof

$$\begin{aligned} \bar{\mathbf{W}}_t &= \mathbf{W}_t - \eta \mathbf{E}_t \text{ with } [\mathbf{E}_t]_{i,j} \sim \mathcal{N}(0, 1) \\ \mathbf{W}_{t+1} &= \bar{\mathbf{W}}_t - \max(0, \bar{\sigma}_{1,t} - \sigma_*) \bar{\mathbf{u}}_{1,t} \bar{\mathbf{v}}_{1,t}^\top \end{aligned}$$

where  $\bar{\sigma}_{1,t} = \sigma_1(\bar{\mathbf{W}}_t)$ ,  $\bar{\mathbf{u}}_{1,t} = \mathbf{u}_1(\bar{\mathbf{W}}_t)$  and  $\bar{\mathbf{v}}_{1,t} = \mathbf{v}_1(\bar{\mathbf{W}}_t)$ . The effect of spectral normalization is observed in the case where  $\sigma_* > \bar{\sigma}_{1,t}$ , otherwise the Lipschitz constant is bounded by  $\sigma_*$ . We therefore have

$$\|\bar{\mathbf{W}}_t\|_F^2 \leq \|\mathbf{W}_t\|_F^2 + \eta^2 d_1 d_0 \quad (4)$$

$$\|\mathbf{W}_{t+1}\|_F^2 = \|\bar{\mathbf{W}}_t\|_F^2 + \sigma_*^2 - \bar{\sigma}_{1,t}^2 \quad (5)$$

- If  $\|\mathbf{W}_{t+1}\|_F \geq \|\mathbf{W}_t\|_F$ , we have by equation 4 and equation 5

$$\|\bar{\mathbf{W}}_t\|_F^2 \leq \|\bar{\mathbf{W}}_t\|_F^2 + \sigma_*^2 - \bar{\sigma}_{1,t}^2 + \eta^2 d_1 d_0 \Rightarrow \|\bar{\mathbf{W}}_t\| = \bar{\sigma}_{1,t} \leq \sqrt{\sigma_*^2 + \eta^2 d_1 d_0} = \delta$$

And since  $\|\mathbf{W}_{t+1}\| \leq \|\bar{\mathbf{W}}_t\|$ , we have  $\|\mathbf{W}_{t+1}\| \leq \delta$ .

- Otherwise, if there exists  $\tau$  such that  $\|\mathbf{W}_{\tau+1}\|_F < \|\mathbf{W}_\tau\|_F$ , then for all  $\varepsilon > 0$  there exists an iteration  $\tau' \geq \tau$  such that  $\|\mathbf{W}_{\tau'}\| \leq \delta + \varepsilon$ . Indeed, otherwise we denote  $\varepsilon_t = \|\mathbf{W}_t\|^2 - \delta^2$  and  $\varepsilon_t > 0$  for all  $t \geq \tau$ . And if for all  $t \geq \tau$ ,  $\|\mathbf{W}_{t+1}\|_F \leq \|\mathbf{W}_t\|_F$ , we have by equation 4 and equation 5

$$\|\mathbf{W}_t\|_F^2 - \|\mathbf{W}_{t+1}\|_F^2 \geq \|\bar{\mathbf{W}}_t\|^2 - \delta^2 \geq \|\mathbf{W}_{t+1}\|^2 - \delta^2 = \varepsilon_{t+1}$$

Integrating the above expression from  $\tau$  to  $T - 1 \geq \tau$ , we end up with

$$\|\mathbf{W}_\tau\|_F^2 - \|\mathbf{W}_T\|_F^2 \geq \sum_{t=\tau}^{T-1} \varepsilon_t \Rightarrow 0 \leq \|\mathbf{W}_T\|_F^2 \leq \|\mathbf{W}_\tau\|_F^2 - \sum_{t=\tau}^{T-1} \varepsilon_t,$$

therefore, when  $T \rightarrow \infty$ ,  $\varepsilon_t$  has to tend to 0 otherwise the right hand-side of the last inequality will tend to  $-\infty$  which is absurd.

□

## References

- Ledoux, M. *The concentration of measure phenomenon*. Number 89. American Mathematical Soc., 2005.
- Louart, C. and Couillet, R. Concentration of measure and large random matrices with an application to sample covariance matrices. *submitted*, 2019.
